# Supplementary material for: Species-specific duplications driving the recent expansion of NBS-LRR genes in five Rosaceae species
Source: PubMed Central journal article supplement (PMC4336698; doi:10.1186/s12864-015-1291-0), 2015-02-14

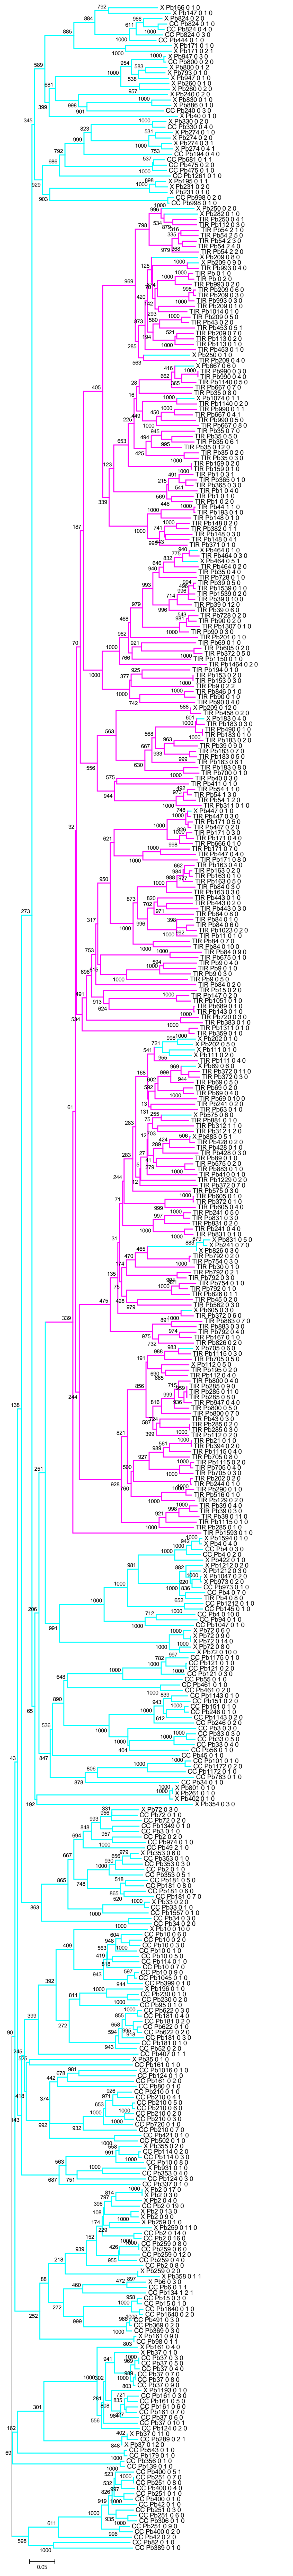

Supplement: 12864_2015_1291_MOESM8_ESM.pdf [file 12864_2015_1291_MOESM8_ESM.pdf]
